# Supplementary material
Source: PubMed Central journal article supplement (PMC4862920)
Supplement: NIHMS771517-supplement-125_2016_3913_MOESM1_ESM.pdf [file NIHMS771517-supplement-125_2016_3913_MOESM1_ESM.pdf]

**ESM Table 1. Characteristics summary of the murine models.**

| <b>Diabetes Status</b>                                                                                          | <b>Non-diabetic control</b> | <b>T1DM-like model</b> | <b>Non-diabetic control</b> | <b>T2DM-like model</b>  |
|-----------------------------------------------------------------------------------------------------------------|-----------------------------|------------------------|-----------------------------|-------------------------|
| <b>Mouse model</b>                                                                                              | <b>DBA2J</b>                | <b>DBA2J-STZ</b>       | <b>BKS <i>db/+</i></b>      | <b>BKS <i>db/db</i></b> |
| <b><u>DPN studies: Wiggin <i>et al.</i> 2008 Endocrinology [10]; Pande <i>et al.</i> 2011 Diabetes [11]</u></b> |                             |                        |                             |                         |
| <b>Terminal age (week)</b>                                                                                      | 34                          | 34                     | 24                          | 24                      |
| <b><i>Metabolic Parameters:</i></b>                                                                             |                             |                        |                             |                         |
| <b>Body Weight (g)</b>                                                                                          | 29.7 ± 3.9                  | 23.5 ± 1.7             | 29.6 ± 1.6                  | 51.8 ± 4.4              |
| <b>Fasting Glucose (mmol/L)</b>                                                                                 | 6.7 ± 1.0                   | 25.1 ± 9.0             | 8.2 ± 1.9                   | 28.0 ± 4.4              |
| <b>% Glycosylated Hemoglobin</b>                                                                                | 5.8 ± 0.9                   | 14.2 ± 1.7             | 7.1 ± 0.6                   | 12.3 ± 0.52             |
| <b><i>Neuropathy Measures:</i></b>                                                                              |                             |                        |                             |                         |
| <b>Hindpaw latency (s)</b>                                                                                      | 6.3 ± 1.0                   | 11.1 ± 0.8             | 2.7 ± 0.6                   | 4.0 ± 1.1               |
| <b>Motor Nerve Conduction Velocity (m/s)</b>                                                                    | 45.5 ± 3.9                  | 34.4 ± 7.1             | 48.3 ± 4.2                  | 30.2 ± 10.4             |
| <b>Sensory Nerve Conduction Velocity (m/s)</b>                                                                  | 23.7 ± 3.5                  | 20.3 ± 3.2             | 20.6 ± 5.0                  | 15.7 ± 5.5              |
| <b>IENF Density (fibers/m<sup>2</sup>)</b>                                                                      | -                           | -                      | 39.8 ± 3.1                  | 27.2 ± 2.8              |
| <b><u>DN study: Hodgin <i>et al.</i> 2013 Diabetes [13]</u></b>                                                 |                             |                        |                             |                         |
| <b>Terminal age (week)</b>                                                                                      | 22                          | 22                     | 24                          | 24                      |
| <b><i>Metabolic Parameters:</i></b>                                                                             |                             |                        |                             |                         |
| <b>Body Weight (g)</b>                                                                                          | 28 ± 1                      | 22 ± 1                 | 31 ± 1                      | 50 ± 1                  |
| <b>Fasting Glucose (mmol/L)</b>                                                                                 | 7.7 ± 0.3                   | 30.9 ± 1.3             | 7.7 ± 0.3                   | 31.3 ± 0.3              |
| <b>% Glycosylated Hemoglobin</b>                                                                                | -                           | -                      | -                           | -                       |
| <b><i>Nephropathy Measures:</i></b>                                                                             |                             |                        |                             |                         |
| <b>Albumin/Creatinine Ratio</b>                                                                                 | 79 ± 11                     | 916 ± 420              | 36 ± 2                      | 426 ± 48                |

This table summarizes the characteristics of the murine models used in the current study, which are reported in our published papers (Wiggin *et al.* 2008 Endocrinology, Pande *et al.* 2011 Diabetes, Hodgin *et al.* 2013 Diabetes). We used the same microarray raw data as in the published papers, with the exception of the Pande *et al.* 2011 Diabetes paper for type 2 diabetes DPN study (*db/db*-SCN). While the published paper (Pande *et al.* 2011 Diabetes) included two batches of microarray data sets (n=7 for *db/+* and n=6 for *db/db* group), our current study only used one batch of microarray data (n=5 for *db/+* and n=6 for *db/db*) for type 2 diabetes DPN (*db/db*-SCN). This discrepancy was unavoidable because the batch-effect cannot be properly addressed in ChipInspector, which was used in the current study to identify differentially expressed genes. DN, diabetic nephropathy; DPN; diabetic peripheral neuropathy; IENF, intraepidermal nerve fiber; T1DM, type 1 diabetes mellitus; T2DM, type 2 diabetes mellitus

## ESM Table 2. Significant signaling pathways of the whole DEG sets.

Significant signaling pathways were identified by GeneRanker (Genomatix Software GmbH, <http://www.genomatix.de>) using a false discovery rate (FDR) < 0.05 as the significance cutoff. The values in the columns 3-6 are the FDR, indicating the statistical significance level. Pathways found significant in at least two DEG sets are given in this table.

| Pathway terms                                                           | # of significant pathways | STZ-Glom | db/db-Glom | STZ-SCN | db/db-SCN |
|-------------------------------------------------------------------------|---------------------------|----------|------------|---------|-----------|
|                                                                         |                           | 32       | 28         | 69      | 58        |
| Reelin signaling pathway                                                | 4                         | 0.032    | 0.006      | 0.006   | 0.003     |
| AKT(PKB)-Bad signaling (IL-7 signaling(JAK1 JAK3 STAT5) )               | 3                         | 0.025    | 0.005      |         | <0.001    |
| AKT(PKB)-Bad signaling (EPO signaling pathway(JAK2 STAT1 STAT3 STAT5) ) | 3                         | 0.032    | 0.003      |         | <0.001    |
| Gene expression (VEGF signaling pathway )                               | 3                         | 0.032    | 0.003      |         | <0.001    |
| Angiopoietin receptor Tie2-mediated signaling                           | 3                         | 0.020    | <0.001     |         | 0.004     |
| IL6-mediated signaling events                                           | 3                         | <0.001   | 0.020      | 0.016   |           |
| Filopodium formation (Integrin signaling pathway )                      | 3                         |          | 0.008      | 0.032   | 0.040     |
| thrombin signaling and protease-activated receptors                     | 3                         |          | 0.025      | 0.010   | 0.032     |
| inhibition of matrix metalloproteinases                                 | 3                         | 0.040    | 0.010      |         | 0.013     |
| Beta1 integrin cell surface interactions                                | 2                         | <0.001   | <0.001     |         |           |
| Thromboxane A2 receptor signaling                                       | 2                         | <0.001   | 0.002      |         |           |
| Plasma membrane estrogen receptor signaling                             | 2                         |          |            | <0.001  | 0.040     |
| regulators of bone mineralization                                       | 2                         |          | 0.001      |         | 0.040     |
| KitReceptor                                                             | 2                         | 0.010    | 0.002      |         |           |
| Integrin family cell surface interactions                               | 2                         | 0.003    | 0.032      |         |           |
| Regulation of RAC1 activity                                             | 2                         |          | 0.010      | 0.003   |           |
| VEGFR3 signaling in lymphatic endothelium                               | 2                         |          | 0.004      |         | 0.040     |
| EGFR1                                                                   | 2                         |          | 0.040      | 0.005   |           |
| igf-1 signaling pathway                                                 | 2                         |          |            | 0.006   | 0.005     |
| IGF1 pathway                                                            | 2                         |          |            | 0.010   | 0.032     |
| AndrogenReceptor                                                        | 2                         |          |            | 0.010   | 0.013     |
| bioactive peptide induced signaling pathway                             | 2                         |          | 0.025      |         | 0.013     |
| Urokinase-type plasminogen activator (uPA) and uPAR-mediated signaling  | 2                         | 0.013    | 0.040      |         |           |
| sumoylation by ranbp2 regulates transcriptional repression              | 2                         |          |            | 0.016   | 0.040     |
| Integrins in angiogenesis                                               | 2                         | 0.016    |            |         | 0.016     |
| Ephrin B reverse signaling                                              | 2                         | 0.016    | 0.025      |         |           |
| regulation of pgc-1a                                                    | 2                         |          | 0.020      |         | 0.025     |
| E-cadherin signaling events                                             | 2                         | 0.025    |            | 0.032   |           |
| Regulation of p38-alpha and p38-beta                                    | 2                         | 0.025    | 0.032      |         |           |
| Regulation of glucocorticoid receptor                                   | 2                         |          |            | 0.050   | 0.032     |
| Endothelins                                                             | 2                         |          | 0.032      | 0.040   |           |

**ESM Table 3. Canonical pathways (type 1 diabetes DN vs type 1 diabetes DPN).**

Significant pathways (Benjamini-Hochberg adjusted P-values <0.05) were identified by GeneRanker (Genomatix) from the four DEG subsets (concordant, discordant, and the two unique sets). The numbers in columns 3-6 are the P-values. The Set-Count column indicates the number of DEG sets which have the corresponding pathway significantly enriched.

| Names                                                                                                                                                       | Set-Count | STZ-Glom-Only | Concordant | Discordant | STZ-SCN-Only |
|-------------------------------------------------------------------------------------------------------------------------------------------------------------|-----------|---------------|------------|------------|--------------|
| foxa2 and foxa3 transcription factor networks                                                                                                               | 2         | 0.015         | 0.004      |            |              |
| lissencephaly gene (lis1) in neuronal migration and development                                                                                             | 2         |               | 0.023      | 0.01       |              |
| kitreceptor                                                                                                                                                 | 2         | 0.028         |            | 0.002      |              |
| g alpha s gdp-gtp exchange signaling (gpcr adenosine a2a receptor signaling pathway)                                                                        | 2         |               |            | 0.01       | 0.044        |
| il6-mediated signaling events                                                                                                                               | 2         | 0.005         |            | 0.023      |              |
| tumor suppressor arf inhibits ribosomal biogenesis                                                                                                          | 2         |               |            | 0.025      | 0.042        |
| validated targets of c-myc transcriptional repression                                                                                                       | 2         |               |            | 0.046      | 0            |
| circadian rhythm pathway                                                                                                                                    | 1         |               | 0.021      |            |              |
| il-3 signaling pathway(jak1 jak2 stat5) ( il-3 signaling(jak1 jak2 stat5) )                                                                                 | 1         |               | 0.029      |            |              |
| posttranslational regulation of adherens junction stability and disassembly                                                                                 | 1         |               | 0.03       |            |              |
| srebp control of lipid synthesis                                                                                                                            | 1         |               | 0.038      |            |              |
| alpha6beta4integrin                                                                                                                                         | 1         |               | 0.04       |            |              |
| eicosanoid metabolism                                                                                                                                       | 1         |               | 0.043      |            |              |
| shp2 signaling                                                                                                                                              | 1         |               | 0.043      |            |              |
| lpa4-mediated signaling events                                                                                                                              | 1         |               |            | 0.002      |              |
| il2 signaling events mediated by pi3k                                                                                                                       | 1         |               |            | 0.01       |              |
| reelin signaling pathway                                                                                                                                    | 1         |               |            | 0.01       |              |
| apoptotic signaling in response to dna damage                                                                                                               | 1         |               |            | 0.011      |              |
| a4b1 and a4b7 integrin signaling                                                                                                                            | 1         |               |            | 0.012      |              |
| west nile virus                                                                                                                                             | 1         |               |            | 0.017      |              |
| canonical wnt signaling pathway                                                                                                                             | 1         |               |            | 0.027      |              |
| il2 signaling events mediated by stat5                                                                                                                      | 1         |               |            | 0.031      |              |
| regulation of nuclear smad2/3 signaling                                                                                                                     | 1         |               |            | 0.033      |              |
| p38 mapk signaling pathway                                                                                                                                  | 1         |               |            | 0.034      |              |
| integrins in angiogenesis                                                                                                                                   | 1         |               |            | 0.037      |              |
| syndecan-4-mediated signaling events                                                                                                                        | 1         |               |            | 0.038      |              |
| angiopoietin receptor tie2-mediated signaling                                                                                                               | 1         |               |            | 0.04       |              |
| filopodium formation ( integrin signaling pathway )                                                                                                         | 1         |               |            | 0.045      |              |
| role of mitochondria in apoptotic signaling                                                                                                                 | 1         |               |            | 0.048      |              |
| thromboxane a2 receptor signaling                                                                                                                           | 1         | 0.002         |            |            |              |
| amb2 integrin signaling                                                                                                                                     | 1         | 0.003         |            |            |              |
| urokinase-type plasminogen activator (upa) and upar-mediated signaling                                                                                      | 1         | 0.008         |            |            |              |
| glypican 1 network                                                                                                                                          | 1         | 0.011         |            |            |              |
| jak_stat_molecularvariation_2                                                                                                                               | 1         | 0.012         |            |            |              |
| intrinsic prothrombin activation pathway                                                                                                                    | 1         | 0.013         |            |            |              |
| ephrinb-ephb pathway                                                                                                                                        | 1         | 0.016         |            |            |              |
| il-10 signaling pathway(jak1 tyk2 stat3) ( il-10 signaling(jak1 tyk2 stat3) )                                                                               | 1         | 0.018         |            |            |              |
| alpha-synuclein signaling                                                                                                                                   | 1         | 0.018         |            |            |              |
| antigen processing and presentation                                                                                                                         | 1         | 0.02          |            |            |              |
| integrin family cell surface interactions                                                                                                                   | 1         | 0.02          |            |            |              |
| vegf and vegfr signaling network                                                                                                                            | 1         | 0.02          |            |            |              |
| cxcr3-mediated signaling events                                                                                                                             | 1         | 0.023         |            |            |              |
| ephrin b reverse signaling                                                                                                                                  | 1         | 0.029         |            |            |              |
| regulation of p38-alpha and p38-beta                                                                                                                        | 1         | 0.033         |            |            |              |
| arf6 signaling events                                                                                                                                       | 1         | 0.037         |            |            |              |
| s1p3 pathway                                                                                                                                                | 1         | 0.037         |            |            |              |
| s1p1 pathway                                                                                                                                                | 1         | 0.044         |            |            |              |
| bone remodeling                                                                                                                                             | 1         | 0.045         |            |            |              |
| signaling pathway from g-protein families                                                                                                                   | 1         |               |            |            | 0            |
| chromatin remodeling by hswi/snf atp-dependent complexes                                                                                                    | 1         |               |            |            | 0            |
| thrombin signaling and protease-activated receptors                                                                                                         | 1         |               |            |            | 0            |
| nuclear receptors coordinate the activities of chromatin remodeling complexes and coactivators to facilitate initiation of transcription in carcinoma cells | 1         |               |            |            | 0            |
| p53 pathway                                                                                                                                                 | 1         |               |            |            | 0.001        |
| tgfbr                                                                                                                                                       | 1         |               |            |            | 0.002        |
| cxcr4 signaling pathway                                                                                                                                     | 1         |               |            |            | 0.002        |
| how progesterone initiates the oocyte maturation                                                                                                            | 1         |               |            |            | 0.002        |
| overview of telomerase rna component gene hterc transcriptional regulation                                                                                  | 1         |               |            |            | 0.002        |

| Names                                                                                                   | Set-Count | STZ-Glom-Only | Concordant | Discordant | STZ-SCN-Only |
|---------------------------------------------------------------------------------------------------------|-----------|---------------|------------|------------|--------------|
| bmp receptor signaling                                                                                  | 1         |               |            |            | 0.002        |
| plasma membrane estrogen receptor signaling                                                             | 1         |               |            |            | 0.002        |
| tgf-beta receptor signaling                                                                             | 1         |               |            |            | 0.002        |
| regulation of spermatogenesis by crem                                                                   | 1         |               |            |            | 0.003        |
| cell proliferation ( pdgf signaling pathway )                                                           | 1         |               |            |            | 0.003        |
| carm1 and regulation of the estrogen receptor                                                           | 1         |               |            |            | 0.005        |
| the information processing pathway at the ifn beta enhancer                                             | 1         |               |            |            | 0.005        |
| phospholipase c signaling pathway                                                                       | 1         |               |            |            | 0.005        |
| s1p2 pathway                                                                                            | 1         |               |            |            | 0.005        |
| regulation of eif-4e and p70s6 kinase                                                                   | 1         |               |            |            | 0.007        |
| nfat and hypertrophy of the heart                                                                       | 1         |               |            |            | 0.007        |
| id                                                                                                      | 1         |               |            |            | 0.008        |
| signaling events activated by hepatocyte growth factor receptor (c-met)                                 | 1         |               |            |            | 0.009        |
| androgenreceptor                                                                                        | 1         |               |            |            | 0.01         |
| coregulation of androgen receptor activity                                                              | 1         |               |            |            | 0.01         |
| foxo family signaling                                                                                   | 1         |               |            |            | 0.011        |
| phospholipids as signalling intermediaries                                                              | 1         |               |            |            | 0.013        |
| regulation of androgen receptor activity                                                                | 1         |               |            |            | 0.013        |
| cell adhesion ( hgf signaling pathway )                                                                 | 1         |               |            |            | 0.015        |
| mtor signaling pathway                                                                                  | 1         |               |            |            | 0.017        |
| trk receptor signaling mediated by pi3k and plc-gamma                                                   | 1         |               |            |            | 0.017        |
| notch                                                                                                   | 1         |               |            |            | 0.018        |
| p75(ntr)-mediated signaling                                                                             | 1         |               |            |            | 0.018        |
| ccr3 signaling in eosinophils                                                                           | 1         |               |            |            | 0.019        |
| regulation of c-myc                                                                                     | 1         |               |            |            | 0.019        |
| role of pi3k subunit p85 in regulation of actin organization and cell migration                         | 1         |               |            |            | 0.02         |
| cystic fibrosis transmembrane conductance regulator (cfr) and beta 2 adrenergic receptor (b2ar) pathway | 1         |               |            |            | 0.02         |
| signaling events mediated by hdac class ii                                                              | 1         |               |            |            | 0.02         |
| influence of ras and rho proteins on g1 to s transition                                                 | 1         |               |            |            | 0.021        |
| p53 signaling pathway                                                                                   | 1         |               |            |            | 0.022        |
| akt(pkb) activation signaling ( insulin receptor signaling (mammal) )                                   | 1         |               |            |            | 0.022        |
| polyadenylation of mrna                                                                                 | 1         |               |            |            | 0.023        |
| segmentation clock                                                                                      | 1         |               |            |            | 0.025        |
| dicer pathway                                                                                           | 1         |               |            |            | 0.026        |
| reversal of insulin resistance by leptin                                                                | 1         |               |            |            | 0.027        |
| trefoil factors initiate mucosal healing                                                                | 1         |               |            |            | 0.027        |
| endothelins                                                                                             | 1         |               |            |            | 0.027        |
| notch signaling pathway                                                                                 | 1         |               |            |            | 0.028        |
| pkc-catalyzed phosphorylation of inhibitory phosphoprotein of myosin phosphatase                        | 1         |               |            |            | 0.029        |
| s1p4 pathway                                                                                            | 1         |               |            |            | 0.029        |
| yaci and bcma stimulation of b cell immune responses                                                    | 1         |               |            |            | 0.031        |
| corticosteroids and cardioprotection                                                                    | 1         |               |            |            | 0.033        |
| pdgf signaling pathway                                                                                  | 1         |               |            |            | 0.033        |
| hedgehog signaling events mediated by gli proteins                                                      | 1         |               |            |            | 0.033        |
| pdgfr-alpha signaling pathway                                                                           | 1         |               |            |            | 0.033        |
| rho-selective guanine exchange factor akap13 mediates stress fiber formation                            | 1         |               |            |            | 0.034        |
| generation of amyloid b-peptide by ps1                                                                  | 1         |               |            |            | 0.036        |
| akt signaling pathway                                                                                   | 1         |               |            |            | 0.039        |
| class i pi3k signaling events mediated by akt                                                           | 1         |               |            |            | 0.039        |
| regulation of ck1/cdk5 by type 1 glutamate receptors                                                    | 1         |               |            |            | 0.043        |
| s1p5 pathway                                                                                            | 1         |               |            |            | 0.043        |
| ctcf: first multivalent nuclear factor                                                                  | 1         |               |            |            | 0.044        |
| transcription factor creb and its extracellular signals                                                 | 1         |               |            |            | 0.047        |
| erk and pi-3 kinase are necessary for collagen binding in corneal epithelia                             | 1         |               |            |            | 0.048        |
| bcr signaling pathway                                                                                   | 1         |               |            |            | 0.048        |
| ras signaling pathway                                                                                   | 1         |               |            |            | 0.049        |
| akt(pkb) activation signaling ( insulin receptor signaling )                                            | 1         |               |            |            | 0.049        |

**ESM Table 4. Canonical pathways (type 2 diabetes DN vs type 2 diabetes DPN).**

Significant pathways (Benjamini-Hochberg adjusted P-values <0.05) were identified by GeneRanker (Genomatix) from the four DEG subsets (concordant, discordant, and the two unique sets). The numbers in columns 3-6 are the P-values. The Set-Count column indicates the number of DEG sets which have the corresponding pathway significantly enriched.

| Names                                                                                                   | Set-Count | db/db-Glom-only | Concordant | Discordant | db/db-SCN-only |
|---------------------------------------------------------------------------------------------------------|-----------|-----------------|------------|------------|----------------|
| cdk regulation of dna replication                                                                       | 2         |                 | 0          |            | 0.026          |
| p73 transcription factor network                                                                        | 2         |                 | 0.018      |            | 0.034          |
| sphingosine 1-phosphate (s1p) pathway                                                                   | 2         |                 | 0.047      |            | 0.033          |
| angiopoietin receptor tie2-mediated signaling                                                           | 2         |                 | 0.049      | 0.014      |                |
| akt(pkb)-bad signaling ( epo signaling pathway(jak2 stat1 stat3 stat5) )                                | 2         |                 |            | 0.001      | 0.005          |
| akt(pkb)-bad signaling ( il-7 signaling(jak1 jak3 stat5) )                                              | 2         |                 |            | 0.002      | 0.001          |
| gene expression ( vegf signaling pathway )                                                              | 2         |                 |            | 0.003      | 0.006          |
| cd40l signaling pathway                                                                                 | 1         |                 | 0          |            |                |
| signal dependent regulation of myogenesis by corepressor mitr                                           | 1         |                 | 0.002      |            |                |
| mapkinase signaling pathway                                                                             | 1         |                 | 0.003      |            |                |
| regulation of retinoblastoma protein                                                                    | 1         |                 | 0.008      |            |                |
| nf-kb signaling pathway                                                                                 | 1         |                 | 0.009      |            |                |
| e2f transcription factor network                                                                        | 1         |                 | 0.009      |            |                |
| p38 mapk signaling pathway                                                                              | 1         |                 | 0.009      |            |                |
| regulation of pgc-1a                                                                                    | 1         |                 | 0.01       |            |                |
| aurora c signaling                                                                                      | 1         |                 | 0.014      |            |                |
| urokinase-type plasminogen activator (upa) and upar-mediated signaling                                  | 1         |                 | 0.018      |            |                |
| tnf receptor signaling pathway                                                                          | 1         |                 | 0.027      |            |                |
| thrombin signaling and protease-activated receptors                                                     | 1         |                 | 0.031      |            |                |
| gata3 participate in activating the th2 cytokine genes expression                                       | 1         |                 | 0.032      |            |                |
| plk1 signaling events                                                                                   | 1         |                 | 0.036      |            |                |
| nflkb activation by nontypeable hemophilus influenzae                                                   | 1         |                 | 0.042      |            |                |
| shp2 signaling                                                                                          | 1         |                 | 0.043      |            |                |
| regulation of nuclear smad2/3 signaling                                                                 | 1         |                 | 0.044      |            |                |
| platelet amyloid precursor protein pathway                                                              | 1         |                 | 0.046      |            |                |
| signaling events mediated by hdac class ii                                                              | 1         |                 | 0.046      |            |                |
| tgfbr                                                                                                   | 1         |                 | 0.047      |            |                |
| bioactive peptide induced signaling pathway                                                             | 1         |                 |            | 0.001      |                |
| retinoic acid receptors-mediated signaling                                                              | 1         |                 |            | 0.001      |                |
| reelin signaling pathway                                                                                | 1         |                 |            | 0.002      |                |
| thromboxane a2 receptor signaling                                                                       | 1         |                 |            | 0.002      |                |
| ion channels and their functional role in vascular endothelium                                          | 1         |                 |            | 0.004      |                |
| integrin signaling pathway                                                                              | 1         |                 |            | 0.005      |                |
| trka receptor signaling pathway                                                                         | 1         |                 |            | 0.005      |                |
| transcription factor creb and its extracellular signals                                                 | 1         |                 |            | 0.007      |                |
| the igf-1 receptor and longevity                                                                        | 1         |                 |            | 0.013      |                |
| inhibition of matrix metalloproteinases                                                                 | 1         |                 |            | 0.018      |                |
| phospholipase c delta in phospholipid associated cell signaling                                         | 1         |                 |            | 0.021      |                |
| ephrin b reverse signaling                                                                              | 1         |                 |            | 0.021      |                |
| regulation of eif-4e and p70s6 kinase                                                                   | 1         |                 |            | 0.024      |                |
| cytokine receptor degradation signaling                                                                 | 1         |                 |            | 0.027      |                |
| canonical wnt signaling pathway                                                                         | 1         |                 |            | 0.027      |                |
| il6-mediated signaling events                                                                           | 1         |                 |            | 0.028      |                |
| osteopontin-mediated events                                                                             | 1         |                 |            | 0.028      |                |
| regulators of bone mineralization                                                                       | 1         |                 |            | 0.03       |                |
| regulation of nuclear smad2/3 signaling                                                                 | 1         |                 |            | 0.033      |                |
| egf signaling pathway                                                                                   | 1         |                 |            | 0.034      |                |
| cystic fibrosis transmembrane conductance regulator (cfr) and beta 2 adrenergic receptor (b2ar) pathway | 1         |                 |            | 0.035      |                |
| syndecan-4-mediated signaling events                                                                    | 1         |                 |            | 0.038      |                |
| inhibition of cellular proliferation by gleevec                                                         | 1         |                 |            | 0.045      |                |
| activation of pkc through g-protein coupled receptors                                                   | 1         |                 |            | 0.045      |                |
| beta1 integrin cell surface interactions                                                                | 1         | 0               |            |            |                |
| regulation of rac1 activity                                                                             | 1         | 0.002           |            |            |                |
| tgf-beta receptor signaling                                                                             | 1         | 0.002           |            |            |                |
| regulation of rhoa activity                                                                             | 1         | 0.003           |            |            |                |
| kitreceptor                                                                                             | 1         | 0.013           |            |            |                |
| tpo signaling pathway(jak2 stat3) ( tpo signaling(jak2 stat3) )                                         | 1         | 0.03            |            |            |                |
| role of erbb2 in signal transduction and oncology                                                       | 1         | 0.032           |            |            |                |

| Names                                                                                  | Set-Count | db/db-Glom-only | Concordant | Discordant | db/db-SCN-only |
|----------------------------------------------------------------------------------------|-----------|-----------------|------------|------------|----------------|
| prion pathway                                                                          | 1         | 0.033           |            |            |                |
| glypican 2 network                                                                     | 1         | 0.033           |            |            |                |
| bmp2 signaling pathway(through tak1) ( bmp2 signaling(through tak1) )                  | 1         | 0.036           |            |            |                |
| lpa4-mediated signaling events                                                         | 1         |                 |            |            | 0              |
| s1p4 pathway                                                                           | 1         |                 |            |            | 0.004          |
| ras signaling pathway                                                                  | 1         |                 |            |            | 0.006          |
| glypican 3 network                                                                     | 1         |                 |            |            | 0.006          |
| s1p5 pathway                                                                           | 1         |                 |            |            | 0.007          |
| aurora a signaling                                                                     | 1         |                 |            |            | 0.009          |
| eukaryotic protein translation                                                         | 1         |                 |            |            | 0.01           |
| aurora b signaling                                                                     | 1         |                 |            |            | 0.013          |
| insulin pathway                                                                        | 1         |                 |            |            | 0.013          |
| s1p2 pathway                                                                           | 1         |                 |            |            | 0.013          |
| antigen processing and presentation                                                    | 1         |                 |            |            | 0.014          |
| lpa receptor mediated events                                                           | 1         |                 |            |            | 0.015          |
| agrin in postsynaptic differentiation                                                  | 1         |                 |            |            | 0.016          |
| erk and pi-3 kinase are necessary for collagen binding in corneal epithelia            | 1         |                 |            |            | 0.017          |
| sonic hedgehog receptor ptc1 regulates cell cycle                                      | 1         |                 |            |            | 0.019          |
| nongenotropic androgen signaling                                                       | 1         |                 |            |            | 0.019          |
| validated nuclear estrogen receptor alpha network                                      | 1         |                 |            |            | 0.019          |
| validated nuclear estrogen receptor alpha network                                      | 1         |                 |            |            | 0.019          |
| erb2/erb3 signaling events                                                             | 1         |                 |            |            | 0.019          |
| regulation of bad phosphorylation                                                      | 1         |                 |            |            | 0.021          |
| integrins in angiogenesis                                                              | 1         |                 |            |            | 0.022          |
| reversal of insulin resistance by leptin                                               | 1         |                 |            |            | 0.023          |
| cdc25 and chk1 regulatory pathway in response to dna damage                            | 1         |                 |            |            | 0.025          |
| fgf signaling pathway                                                                  | 1         |                 |            |            | 0.027          |
| insulin signaling pathway                                                              | 1         |                 |            |            | 0.035          |
| role of ran in mitotic spindle regulation                                              | 1         |                 |            |            | 0.038          |
| g alpha s gdp-gtp exchange signaling ( gpcr adenosine a2a receptor signaling pathway ) | 1         |                 |            |            | 0.038          |
| p38 signaling mediated by mapkap kinases                                               | 1         |                 |            |            | 0.038          |
| repression of pain sensation by the transcriptional regulator dream                    | 1         |                 |            |            | 0.04           |
| endothelins                                                                            | 1         |                 |            |            | 0.04           |
| estrogen responsive protein efp controls cell cycle and breast tumors growth           | 1         |                 |            |            | 0.044          |
| e-cadherin signaling events                                                            | 1         |                 |            |            | 0.045          |
| signaling events mediated by focal adhesion kinase                                     | 1         |                 |            |            | 0.045          |
| ikk-nf-kappab cascade ( cd4 t cell receptor signaling )                                | 1         |                 |            |            | 0.046          |
| cdc42 signaling events                                                                 | 1         |                 |            |            | 0.046          |
| cell cycle: g2/m checkpoint                                                            | 1         |                 |            |            | 0.047          |
| sumoylation by ranbp2 regulates transcriptional repression                             | 1         |                 |            |            | 0.047          |
| igf-1 signaling pathway                                                                | 1         |                 |            |            | 0.049          |
| neurotrophic factor-mediated trk receptor signaling                                    | 1         |                 |            |            | 0.049          |

**ESM Table 5. The 20 most up-regulated genes and 20 most down-regulated genes that are concordantly dysregulated in type 1 diabetes DN and type 2 diabetes DN.**

The fold-changes (FC) by diabetes are highlighted in red (up-regulated) and green (down-regulated).

| Gene ID   | Symbol    | Description                                                        | STZ-Glom FC | db/db-Glom FC | Average FC |
|-----------|-----------|--------------------------------------------------------------------|-------------|---------------|------------|
| 13119     | Cyp4a14   | cytochrome P450, family 4, subfamily a, polypeptide 14             | 11.96       | 9.25          | 10.61      |
| 16819     | Lcn2      | lipocalin 2                                                        | 1.87        | 11.79         | 6.83       |
| 76074     | Gbp8      | guanylate-binding protein 8                                        | 6.82        | 6.68          | 6.75       |
| 100034251 | Wfdc17    | WAP four-disulfide core domain 17                                  | 3.14        | 7.36          | 5.25       |
| 20715     | Serpina3g | serine (or cysteine) peptidase inhibitor, clade A, member 3G       | 3.92        | 5.70          | 4.81       |
| 14289     | Fpr2      | formyl peptide receptor 2                                          | 2.60        | 6.88          | 4.74       |
| 12655     | Chil3     | chitinase-like 3                                                   | 1.82        | 7.31          | 4.56       |
| 20568     | Slpi      | secretory leukocyte peptidase inhibitor                            | 2.64        | 5.86          | 4.25       |
| 68774     | Ms4a6d    | membrane-spanning 4-domains, subfamily A, member 6D                | 2.16        | 5.94          | 4.05       |
| 229214    | Qrfpr     | pyroglutamylated RFamide peptide receptor                          | 2.11        | 5.51          | 3.81       |
| 11801     | Cd5l      | CD5 antigen-like                                                   | 1.48        | 5.82          | 3.65       |
| 15439     | Hp        | haptoglobin                                                        | 1.48        | 5.35          | 3.42       |
| 13924     | Ptprv     | protein tyrosine phosphatase, receptor type, V                     | 1.95        | 4.82          | 3.38       |
| 17384     | Mmp10     | matrix metalloproteinase 10                                        | 1.48        | 5.28          | 3.38       |
| 380794    | Ighg      | immunoglobulin heavy chain (gamma polypeptide)                     | 1.30        | 5.37          | 3.34       |
| 57875     | Angptl4   | angiopoietin-like 4                                                | 1.82        | 4.13          | 2.97       |
| 20310     | Cxcl2     | chemokine (C-X-C motif) ligand 2                                   | 1.42        | 4.44          | 2.93       |
| 211187    | Lrtm2     | leucine-rich repeats and transmembrane domains 2                   | 1.46        | 4.32          | 2.89       |
| 246256    | Fcgr4     | Fc receptor, IgG, low affinity IV                                  | 2.11        | 3.66          | 2.88       |
| 64380     | Ms4a4c    | membrane-spanning 4-domains, subfamily A, member 4C                | 3.04        | 2.69          | 2.87       |
| 20216     | Acsm3     | acyl-CoA synthetase medium-chain family member 3                   | -1.74       | -3.16         | -2.45      |
| 27204     | Syn3      | synapsin III                                                       | -1.68       | -3.26         | -2.47      |
| 12425     | Cckar     | cholecystokinin A receptor                                         | -2.48       | -2.51         | -2.50      |
| 70059     | Degs2     | degenerative spermatocyte homolog 2 (Drosophila), lipid desaturase | -1.71       | -3.39         | -2.55      |
| 171284    | Timd2     | T cell immunoglobulin and mucin domain containing 2                | -1.88       | -3.23         | -2.55      |
| 69836     | Pla2g12b  | phospholipase A2, group XIIIB                                      | -1.60       | -3.51         | -2.55      |
| 105387    | Akr1c14   | aldo-keto reductase family 1, member C14                           | -2.01       | -3.14         | -2.58      |
| 74087     | Slc7a13   | solute carrier family 7 member 13                                  | -1.14       | -4.06         | -2.60      |
| 380997    | Cyp2d12   | cytochrome P450, family 2, subfamily d, polypeptide 12             | -2.16       | -3.10         | -2.63      |
| 69787     | Anxa13    | annexin A13                                                        | -2.23       | -3.07         | -2.65      |
| 70370     | Fbln7     | fibulin 7                                                          | -1.66       | -3.69         | -2.67      |
| 234564    | Ces1f     | carboxylesterase 1F                                                | -1.92       | -3.46         | -2.69      |
| 12350     | Car3      | carbonic anhydrase 3                                               | -2.09       | -3.38         | -2.73      |
| 230459    | Cyp2j13   | cytochrome P450, family 2, subfamily j, polypeptide 13             | -1.90       | -3.60         | -2.75      |
| 17242     | Mdk       | midkine                                                            | -1.92       | -4.08         | -3.00      |
| 11818     | Apoh      | apolipoprotein H                                                   | -3.61       | -2.45         | -3.03      |
| 54612     | Sfrp5     | secreted frizzled-related sequence protein 5                       | -2.45       | -3.86         | -3.15      |
| 22139     | Ttr       | transthyretin                                                      | -5.82       | -3.01         | -4.41      |
| 28248     | Slco1a1   | solute carrier organic anion transporter family, member 1a1        | -2.58       | -8.63         | -5.61      |
| 108114    | Slc22a7   | solute carrier family 22 (organic anion transporter), member 7     | -2.89       | -8.82         | -5.85      |

**ESM Table 6. Canonical pathways (type 1 diabetes DN vs type 2 diabetes DN).**

Significant pathways (Benjamini-Hochberg adjusted P-values <0.05) were identified by GeneRanker (Genomatix) from the four DEG subsets (concordant, discordant, and the two unique sets). The numbers in columns 3-6 are the P-values. The Set-Count column indicates the number of DEG sets which have the corresponding pathway significantly enriched.

| Names                                                                                                    | Set-Count | STZ-Glom-only | Concordant | Discordant | db/db-Glom-only |
|----------------------------------------------------------------------------------------------------------|-----------|---------------|------------|------------|-----------------|
| foxa2 and foxa3 transcription factor networks                                                            | 3         | 0.023         | 0.021      | 0.004      |                 |
| il6-mediated signaling events                                                                            | 2         | 0.032         | 0          |            |                 |
| thromboxane a2 receptor signaling                                                                        | 2         | 0.024         | 0.02       |            |                 |
| regulation of rac1 activity                                                                              | 2         |               |            | 0.048      | 0.024           |
| g alpha s gdp-gtp exchange signaling ( gpcr adenosine a2a receptor signaling pathway )                   | 2         | 0             |            |            | 0.005           |
| lpa4-mediated signaling events                                                                           | 2         | 0.001         |            |            | 0.002           |
| lpa receptor mediated events                                                                             | 2         | 0.018         |            |            | 0.01            |
| integrin family cell surface interactions                                                                | 1         |               | 0          |            |                 |
| kitreceptor                                                                                              | 1         |               | 0.001      |            |                 |
| beta1 integrin cell surface interactions                                                                 | 1         |               | 0.001      |            |                 |
| jak_stat_molecularvariation_2                                                                            | 1         |               | 0.002      |            |                 |
| angiopoietin receptor tie2-mediated signaling                                                            | 1         |               | 0.002      |            |                 |
| urokinase-type plasminogen activator (upa) and upar-mediated signaling                                   | 1         |               | 0.002      |            |                 |
| ifn alpha signaling pathway                                                                              | 1         |               | 0.003      |            |                 |
| inhibition of matrix metalloproteinases                                                                  | 1         |               | 0.005      |            |                 |
| il-6 signaling pathway(jak1 jak2 stat3) ( il-6 signaling(jak1 jak2 stat3) )                              | 1         |               | 0.005      |            |                 |
| cbl mediated ligand-induced downregulation of egf receptors pathway                                      | 1         |               | 0.01       |            |                 |
| th2 cell proliferation ( il-4 signaling(jak1 jak3 stat6) )                                               | 1         |               | 0.013      |            |                 |
| vegfr3 signaling in lymphatic endothelium                                                                | 1         |               | 0.015      |            |                 |
| ephrin b reverse signaling                                                                               | 1         |               | 0.016      |            |                 |
| il4-mediated signaling events                                                                            | 1         |               | 0.017      |            |                 |
| phospholipase c delta in phospholipid associated cell signaling                                          | 1         |               | 0.018      |            |                 |
| syndecan-4-mediated signaling events                                                                     | 1         |               | 0.019      |            |                 |
| extrinsic prothrombin activation pathway                                                                 | 1         |               | 0.024      |            |                 |
| il 4 signaling pathway                                                                                   | 1         |               | 0.024      |            |                 |
| alpha6beta4integrin                                                                                      | 1         |               | 0.026      |            |                 |
| hif-1-alpha transcription factor network                                                                 | 1         |               | 0.027      |            |                 |
| glypican 1 network                                                                                       | 1         |               | 0.028      |            |                 |
| signaling events mediated by tcptp                                                                       | 1         |               | 0.029      |            |                 |
| circadian rhythm pathway                                                                                 | 1         |               | 0.034      |            |                 |
| cystic fibrosis transmembrane conductance regulator (cftr) and beta 2 adrenergic receptor (b2ar) pathway | 1         |               | 0.035      |            |                 |
| multi-drug resistance factors                                                                            | 1         |               | 0.04       |            |                 |
| stat3 signaling pathway                                                                                  | 1         |               | 0.04       |            |                 |
| il2 signaling events mediated by pi3k                                                                    | 1         |               | 0.041      |            |                 |
| signaling events mediated by ptp1b                                                                       | 1         |               | 0.042      |            |                 |
| vegf and vegfr signaling network                                                                         | 1         |               | 0.045      |            |                 |
| il 6 signaling pathway                                                                                   | 1         |               | 0.046      |            |                 |
| rxr and rar heterodimerization with other nuclear receptor                                               | 1         |               | 0.048      |            |                 |
| stabilization and expansion of the e-cadherin adherens junction                                          | 1         |               |            | 0.008      |                 |
| bmp2 signaling pathway(through smad) ( tgf-beta_bmp diagram(molecularvariation) )                        | 1         |               |            | 0.011      |                 |
| lissencephaly gene (lis1) in neuronal migration and development                                          | 1         |               |            | 0.035      |                 |
| e-cadherin signaling in the nascent adherens junction                                                    | 1         |               |            | 0.041      |                 |
| antigen processing and presentation                                                                      | 1         | 0.002         |            |            |                 |
| cell to cell adhesion signaling                                                                          | 1         | 0.007         |            |            |                 |
| sumoylation by ranbp2 regulates transcriptional repression                                               | 1         | 0.007         |            |            |                 |
| sumoylation by ranbp2 regulates transcriptional repression                                               | 1         | 0.008         |            |            |                 |
| integrins in angiogenesis                                                                                | 1         | 0.012         |            |            |                 |
| e-cadherin signaling events                                                                              | 1         | 0.015         |            |            |                 |
| cycling of ran in nucleocytoplasmic transport                                                            | 1         | 0.019         |            |            |                 |
| regulation of bad phosphorylation                                                                        | 1         | 0.03          |            |            |                 |
| il-10 signaling pathway(jak1 tyk2 stat3) ( il-10 signaling(jak1 tyk2 stat3) )                            | 1         | 0.03          |            |            |                 |
| insulin pathway                                                                                          | 1         | 0.03          |            |            |                 |
| arf6 signaling events                                                                                    | 1         | 0.04          |            |            |                 |
| arf6 trafficking events                                                                                  | 1         | 0.044         |            |            |                 |
| endothelins                                                                                              | 1         |               |            |            | 0               |



| Names                                                                    | Set-Count | STZ-Glom-only | Concordant | Discordant | db/db-Glom-only |
|--------------------------------------------------------------------------|-----------|---------------|------------|------------|-----------------|
| integrin signaling pathway                                               | 1         |               |            |            | 0.003           |
| regulation of rhoa activity                                              | 1         |               |            |            | 0.003           |
| regulators of bone mineralization                                        | 1         |               |            |            | 0.011           |
| thrombin signaling and protease-activated receptors                      | 1         |               |            |            | 0.012           |
| tumor suppressor arf inhibits ribosomal biogenesis                       | 1         |               |            |            | 0.013           |
| chaperones modulate interferon signaling pathway                         | 1         |               |            |            | 0.016           |
| akt signaling pathway                                                    | 1         |               |            |            | 0.018           |
| tnf alpha/nf-kb                                                          | 1         |               |            |            | 0.019           |
| gene expression ( vegf signaling pathway )                               | 1         |               |            |            | 0.021           |
| influence of ras and rho proteins on g1 to s transition                  | 1         |               |            |            | 0.022           |
| androgenreceptor                                                         | 1         |               |            |            | 0.024           |
| akt(pkb)-bad signaling ( il-7 signaling(jak1 jak3 stat5) )               | 1         |               |            |            | 0.024           |
| akt(pkb)-bad signaling ( epo signaling pathway(jak2 stat1 stat3 stat5) ) | 1         |               |            |            | 0.025           |
| trefoil factors initiate mucosal healing                                 | 1         |               |            |            | 0.036           |
| signaling events mediated by the hedgehog family                         | 1         |               |            |            | 0.037           |
| regulation of androgen receptor activity                                 | 1         |               |            |            | 0.039           |
| uclalpain and friends in cell spread                                     | 1         |               |            |            | 0.04            |
| cd40l signaling pathway                                                  | 1         |               |            |            | 0.044           |
| canonical nf-kappab pathway                                              | 1         |               |            |            | 0.044           |

**ESM Table 7. The 20 most up-regulated genes and 20 most down-regulated genes that are concordantly dysregulated in type 1 diabetes DPN and type 2 diabetes DPN.**

The fold-changes (FC) by diabetes are highlighted in red (up-regulated) and green (down-regulated).

| Gene ID | Symbol        | Description                                                                         | STZ-SCN FC | db/db-SCN FC | Average FC |
|---------|---------------|-------------------------------------------------------------------------------------|------------|--------------|------------|
| 29818   | Hspb7         | heat shock protein family, member 7 (cardiovascular)                                | 1.83       | 4.26         | 3.04       |
| 217946  | Cdca7l        | cell division cycle associated 7 like                                               | 1.41       | 4.66         | 3.04       |
| 71886   | 2310002L09Rik | RIKEN cDNA 2310002L09 gene                                                          | 1.35       | 4.72         | 3.04       |
| 66790   | Grtp1         | GH regulated TBC protein 1                                                          | 1.44       | 4.05         | 2.75       |
| 68453   | Gpihbp1       | GPI-anchored HDL-binding protein 1                                                  | 2.45       | 2.68         | 2.56       |
| 57875   | Angptl4       | angiopoietin-like 4                                                                 | 1.56       | 3.39         | 2.47       |
| 16997   | Ltbp2         | latent transforming growth factor beta binding protein 2                            | 2.06       | 2.88         | 2.47       |
| 232599  | Gm4876        | predicted gene 4876                                                                 | 1.64       | 3.07         | 2.35       |
| 75590   | Dusp9         | dual specificity phosphatase 9                                                      | 1.39       | 3.20         | 2.29       |
| 12984   | Csf2rb2       | colony stimulating factor 2 receptor, beta 2, low-affinity (granulocyte-macrophage) | 2.62       | 1.91         | 2.26       |
| 239126  | C1qtnf9       | C1q and tumor necrosis factor related protein 9                                     | 2.62       | 1.79         | 2.21       |
| 76843   | Dtl           | denticleless homolog (Drosophila)                                                   | 1.33       | 3.07         | 2.20       |
| 67177   | Cdt1          | chromatin licensing and DNA replication factor 1                                    | 1.48       | 2.68         | 2.08       |
| 60527   | Fads3         | fatty acid desaturase 3                                                             | 1.51       | 2.54         | 2.02       |
| 14229   | Fkbp5         | FK506 binding protein 5                                                             | 1.86       | 2.11         | 1.98       |
| 53608   | Map3k6        | mitogen-activated protein kinase kinase kinase 6                                    | 2.01       | 1.88         | 1.95       |
| 17919   | Myo5b         | myosin VB                                                                           | 1.76       | 2.14         | 1.95       |
| 15259   | Hipk3         | homeodomain interacting protein kinase 3                                            | 1.75       | 2.14         | 1.95       |
| 228790  | Asxl1         | additional sex combs like 1                                                         | 2.01       | 1.79         | 1.90       |
| 207728  | Pde2a         | phosphodiesterase 2A, cGMP-stimulated                                               | 1.79       | 1.99         | 1.89       |
| 268890  | Lsamp         | limbic system-associated membrane protein                                           | -3.28      | -4.08        | -3.68      |
| 17755   | Map1b         | microtubule-associated protein 1B                                                   | -3.03      | -4.45        | -3.74      |
| 15444   | Hpca          | hippocalcin                                                                         | -4.23      | -3.58        | -3.91      |
| 72902   | Spock3        | sparc/osteonectin, cwcv and kazal-like domains proteoglycan 3                       | -3.56      | -5.46        | -4.51      |
| 29859   | Sult4a1       | sulfotransferase family 4A, member 1                                                | -4.89      | -4.23        | -4.56      |
| 17758   | Map4          | microtubule-associated protein 4                                                    | -4.03      | -5.24        | -4.63      |
| 15572   | Elavl4        | ELAV (embryonic lethal, abnormal vision, Drosophila)-like 4 (Hu antigen D)          | -3.71      | -5.65        | -4.68      |
| 75276   | Ppp1r1c       | protein phosphatase 1, regulatory (inhibitor) subunit 1C                            | -3.71      | -5.94        | -4.82      |
| 15569   | Elavl2        | ELAV (embryonic lethal, abnormal vision, Drosophila)-like 2 (Hu antigen B)          | -2.84      | -6.89        | -4.87      |
| 69480   | Ttc9          | tetratricopeptide repeat domain 9                                                   | -3.63      | -6.36        | -5.00      |
| 20983   | Syt4          | synaptotagmin IV                                                                    | -3.31      | -6.75        | -5.03      |
| 20614   | Snap25        | synaptosomal-associated protein 25                                                  | -2.53      | -8.17        | -5.35      |
| 78283   | Map7d2        | MAP7 domain containing 2                                                            | -3.56      | -7.55        | -5.56      |
| 16392   | Isl1          | ISL1 transcription factor, LIM/homeodomain                                          | -5.70      | -5.54        | -5.62      |
| 72003   | Synpr         | synaptoporin                                                                        | -4.20      | -7.31        | -5.75      |
| 22771   | Zic1          | zinc finger protein of the cerebellum 1                                             | -9.34      | -6.23        | -7.78      |
| 18039   | Nefl          | neurofilament, light polypeptide                                                    | -3.51      | -12.38       | -7.94      |
| 21333   | Tac1          | tachykinin 1                                                                        | -6.63      | -9.99        | -8.31      |
| 24046   | Scn11a        | sodium channel, voltage-gated, type XI, alpha                                       | -6.63      | -11.96       | -9.30      |
| 22152   | Tubb3         | tubulin, beta 3 class III                                                           | -7.62      | -13.64       | -10.63     |

**ESM Table 8. Canonical pathways (type 1 diabetes DPN vs type 2 diabetes DPN).**

Significant pathways (Benjamini-Hochberg adjusted P-values <0.05) were identified by GeneRanker (Genomatix) from the four DEG subsets (concordant, discordant, and the two unique sets). The numbers in columns 3-6 are the P-values. The Set-Count column indicates the number of DEG sets which have the corresponding pathway significantly enriched.

| Names                                                                                                                                  | Set-Count | STZ-SCN-only | Concordant | Discordant | db/db-SCN-only |
|----------------------------------------------------------------------------------------------------------------------------------------|-----------|--------------|------------|------------|----------------|
| akt(pkb)-bad signaling ( il-7 signaling(jak1 jak3 stat5) )                                                                             | 2         |              | 0.005      |            | 0              |
| akt(pkb)-bad signaling ( epo signaling pathway(jak2 stat1 stat3 stat5) )                                                               | 2         |              | 0.006      |            | 0              |
| gene expression ( vegf signaling pathway )                                                                                             | 2         |              | 0.006      |            | 0              |
| lissencephaly gene (lis1) in neuronal migration and development                                                                        | 2         |              | 0.013      | 0.023      |                |
| reversal of insulin resistance by leptin                                                                                               | 2         | 0.012        | 0.018      |            |                |
| igf-1 signaling pathway                                                                                                                | 2         |              | 0.031      | 0.027      |                |
| coregulation of androgen receptor activity                                                                                             | 2         |              | 0.033      | 0.009      |                |
| validated targets of c-myc transcriptional repression                                                                                  | 2         | 0.004        |            | 0.009      |                |
| thrombin signaling and protease-activated receptors                                                                                    | 2         | 0.046        |            | 0.013      |                |
| regulation of eif-4e and p70s6 kinase                                                                                                  | 2         | 0.036        |            | 0.041      |                |
| skeletal muscle hypertrophy is regulated via akt-mtor pathway                                                                          | 2         | 0.021        |            | 0.044      |                |
| validated nuclear estrogen receptor alpha network                                                                                      | 2         | 0.019        |            |            | 0.004          |
| validated nuclear estrogen receptor alpha network                                                                                      | 2         | 0.019        |            |            | 0.004          |
| regulation of bad phosphorylation                                                                                                      | 1         |              | 0.003      |            |                |
| keratinocyte differentiation                                                                                                           | 1         |              | 0.007      |            |                |
| erk cascade ( igf1 signaling pathway )                                                                                                 | 1         |              | 0.01       |            |                |
| notch                                                                                                                                  | 1         |              | 0.021      |            |                |
| cytosolic calcium ion concentration elevation (through ip3 receptor) ( gpqr groupi metabotropic glutamate receptor signaling pathway ) | 1         |              | 0.023      |            |                |
| fc epsilon receptor i signaling in mast cells                                                                                          | 1         |              | 0.024      |            |                |
| fgf signaling pathway                                                                                                                  | 1         |              | 0.024      |            |                |
| regulation of glucocorticoid receptor                                                                                                  | 1         |              | 0.024      |            |                |
| reelin signaling pathway                                                                                                               | 1         |              | 0.027      |            |                |
| cytokine receptor degradation signaling                                                                                                | 1         |              | 0.028      |            |                |
| erbb2/erbb3 signaling events                                                                                                           | 1         |              | 0.029      |            |                |
| il2 signaling events mediated by pi3k                                                                                                  | 1         |              | 0.029      |            |                |
| transcription factor creb and its extracellular signals                                                                                | 1         |              | 0.031      |            |                |
| egf signaling pathway                                                                                                                  | 1         |              | 0.031      |            |                |
| mcalpain and friends in cell motility                                                                                                  | 1         |              | 0.034      |            |                |
| rxr and rar heterodimerization with other nuclear receptor                                                                             | 1         |              | 0.038      |            |                |
| inhibition of cellular proliferation by gleevec                                                                                        | 1         |              | 0.041      |            |                |
| ifn-gamma pathway                                                                                                                      | 1         |              | 0.041      |            |                |
| mechanisms of transcriptional repression by dna methylation                                                                            | 1         |              | 0.041      |            |                |
| neuroregulin receptor degradation protein-1 controls erbb3 receptor recycling                                                          | 1         |              | 0.045      |            |                |
| il2-mediated signaling events                                                                                                          | 1         |              | 0.046      |            |                |
| role of erk5 in neuronal survival pathway                                                                                              | 1         |              |            | 0.001      |                |
| dicer pathway                                                                                                                          | 1         |              |            | 0.003      |                |
| influence of ras and rho proteins on g1 to s transition                                                                                | 1         |              |            | 0.003      |                |
| nongenotropic androgen signaling                                                                                                       | 1         |              |            | 0.003      |                |
| tumor suppressor arf inhibits ribosomal biogenesis                                                                                     | 1         |              |            | 0.005      |                |
| eukaryotic protein translation                                                                                                         | 1         |              |            | 0.006      |                |
| angiopoietin receptor tie2-mediated signaling                                                                                          | 1         |              |            | 0.006      |                |
| signaling events mediated by focal adhesion kinase                                                                                     | 1         |              |            | 0.008      |                |
| alpha4 beta1 integrin signaling events                                                                                                 | 1         |              |            | 0.008      |                |
| paxillin-independent events mediated by a4b1 and a4b7                                                                                  | 1         |              |            | 0.009      |                |
| signal dependent regulation of myogenesis by corepressor mitr                                                                          | 1         |              |            | 0.011      |                |
| androgenreceptor                                                                                                                       | 1         |              |            | 0.013      |                |
| role of parkin in ubiquitin-proteasomal pathway                                                                                        | 1         |              |            | 0.013      |                |
| hypoxia-inducible factor in the cardiovascular system                                                                                  | 1         |              |            | 0.014      |                |
| human cytomegalovirus and map kinase pathways                                                                                          | 1         |              |            | 0.015      |                |
| vegfr3 signaling in lymphatic endothelium                                                                                              | 1         |              |            | 0.016      |                |
| signaling events activated by hepatocyte growth factor receptor (c-met)                                                                | 1         |              |            | 0.016      |                |
| egfr1                                                                                                                                  | 1         |              |            | 0.017      |                |
| vegfr1 specific signals                                                                                                                | 1         |              |            | 0.021      |                |
| sprouty regulation of tyrosine kinase signals                                                                                          | 1         |              |            | 0.026      |                |
| igf1 pathway                                                                                                                           | 1         |              |            | 0.028      |                |
| fc-epsilon receptor i signaling in mast cells                                                                                          | 1         |              |            | 0.029      |                |
| cyclins and cell cycle regulation                                                                                                      | 1         |              |            | 0.03       |                |

| Names                                                                                                                                                       | Set-Count | STZ-SCN-only | Concordant | Discordant | db/db-SCN-only |
|-------------------------------------------------------------------------------------------------------------------------------------------------------------|-----------|--------------|------------|------------|----------------|
| control of skeletal myogenesis by hdac and calcium/calmodulin-dependent kinase (camk)                                                                       | 1         |              |            | 0.031      |                |
| cell proliferation ( pdgf signaling pathway )                                                                                                               | 1         |              |            | 0.032      |                |
| s1p4 pathway                                                                                                                                                | 1         |              |            | 0.034      |                |
| bcr signaling pathway                                                                                                                                       | 1         |              |            | 0.036      |                |
| il6-mediated signaling events                                                                                                                               | 1         |              |            | 0.036      |                |
| urokinase-type plasminogen activator (upa) and upar-mediated signaling                                                                                      | 1         |              |            | 0.036      |                |
| pten dependent cell cycle arrest and apoptosis                                                                                                              | 1         |              |            | 0.038      |                |
| pkc-catalyzed phosphorylation of inhibitory phosphoprotein of myosin phosphatase                                                                            | 1         |              |            | 0.042      |                |
| mtor signaling pathway                                                                                                                                      | 1         |              |            | 0.045      |                |
| overview of telomerase rna component gene hterc transcriptional regulation                                                                                  | 1         |              |            | 0.046      |                |
| b cell survival pathway                                                                                                                                     | 1         |              |            | 0.048      |                |
| trefoil factors initiate mucosal healing                                                                                                                    | 1         |              |            | 0.049      |                |
| regulation of spermatogenesis by crem                                                                                                                       | 1         | 0.001        |            |            |                |
| regulation of nuclear smad2/3 signaling                                                                                                                     | 1         | 0.003        |            |            |                |
| cystic fibrosis transmembrane conductance regulator (cfr) and beta 2 adrenergic receptor (b2ar) pathway                                                     | 1         | 0.004        |            |            |                |
| tgfbr                                                                                                                                                       | 1         | 0.006        |            |            |                |
| plasma membrane estrogen receptor signaling                                                                                                                 | 1         | 0.007        |            |            |                |
| alpha6beta4integrin                                                                                                                                         | 1         | 0.009        |            |            |                |
| canonical wnt signaling pathway                                                                                                                             | 1         | 0.01         |            |            |                |
| chrebp regulation by carbohydrates and camp                                                                                                                 | 1         | 0.012        |            |            |                |
| chromatin remodeling by hswi/snf atp-dependent complexes                                                                                                    | 1         | 0.013        |            |            |                |
| regulation of c-myc                                                                                                                                         | 1         | 0.013        |            |            |                |
| nuclear receptors coordinate the activities of chromatin remodeling complexes and coactivators to facilitate initiation of transcription in carcinoma cells | 1         | 0.014        |            |            |                |
| regulation of telomerase                                                                                                                                    | 1         | 0.018        |            |            |                |
| ccr3 signaling in eosinophils                                                                                                                               | 1         | 0.019        |            |            |                |
| the information processing pathway at the ifn beta enhancer                                                                                                 | 1         | 0.019        |            |            |                |
| validated transcriptional targets of ap1 family members fra1 and fra2                                                                                       | 1         | 0.021        |            |            |                |
| tgf-beta receptor signaling                                                                                                                                 | 1         | 0.022        |            |            |                |
| multi-step regulation of transcription by pitx2                                                                                                             | 1         | 0.026        |            |            |                |
| p53 pathway                                                                                                                                                 | 1         | 0.026        |            |            |                |
| activation of csk by camp-dependent protein kinase inhibits signaling through the t cell receptor                                                           | 1         | 0.027        |            |            |                |
| phospholipids as signalling intermediaries                                                                                                                  | 1         | 0.028        |            |            |                |
| how progesterone initiates the oocyte maturation                                                                                                            | 1         | 0.028        |            |            |                |
| foxo family signaling                                                                                                                                       | 1         | 0.028        |            |            |                |
| signaling pathway from g-protein families                                                                                                                   | 1         | 0.03         |            |            |                |
| foxa2 and foxa3 transcription factor networks                                                                                                               | 1         | 0.03         |            |            |                |
| integrin-linked kinase signaling                                                                                                                            | 1         | 0.03         |            |            |                |
| yaci and bcma stimulation of b cell immune responses                                                                                                        | 1         | 0.031        |            |            |                |
| bmp receptor signaling                                                                                                                                      | 1         | 0.031        |            |            |                |
| telomeres telomerase cellular aging and immortality                                                                                                         | 1         | 0.033        |            |            |                |
| segmentation clock                                                                                                                                          | 1         | 0.042        |            |            |                |
| beta catenin degradation signaling (canonical) ( canonical wnt signaling pathway diagram )                                                                  | 1         | 0.042        |            |            |                |
| regulation of rac1 activity                                                                                                                                 | 1         | 0.044        |            |            |                |
| wnt signaling pathway                                                                                                                                       | 1         | 0.046        |            |            |                |
| signaling without wnt (mammal) ( mammalian wnt signaling pathway diagram )                                                                                  | 1         | 0.048        |            |            |                |
| plk1 signaling events                                                                                                                                       | 1         |              |            |            | 0.001          |
| cdk regulation of dna replication                                                                                                                           | 1         |              |            |            | 0.003          |
| antigen processing and presentation                                                                                                                         | 1         |              |            |            | 0.003          |
| integrin signaling pathway                                                                                                                                  | 1         |              |            |            | 0.005          |
| p73 transcription factor network                                                                                                                            | 1         |              |            |            | 0.006          |
| deregulation of cdk5 in alzheimers disease                                                                                                                  | 1         |              |            |            | 0.009          |
| regulation of p38-alpha and p38-beta                                                                                                                        | 1         |              |            |            | 0.009          |
| cdc42 signaling events                                                                                                                                      | 1         |              |            |            | 0.01           |
| role of ran in mitotic spindle regulation                                                                                                                   | 1         |              |            |            | 0.012          |
| aurora a signaling                                                                                                                                          | 1         |              |            |            | 0.012          |
| foxm1 transcription factor network                                                                                                                          | 1         |              |            |            | 0.014          |
| nephrin/neph1 signaling in the kidney podocyte                                                                                                              | 1         |              |            |            | 0.019          |
| sphingosine 1-phosphate (s1p) pathway                                                                                                                       | 1         |              |            |            | 0.022          |
| lpa4-mediated signaling events                                                                                                                              | 1         |              |            |            | 0.027          |
| trk receptor signaling mediated by the mapk pathway                                                                                                         | 1         |              |            |            | 0.027          |
| integrins in angiogenesis                                                                                                                                   | 1         |              |            |            | 0.029          |
| cdc25 and chk1 regulatory pathway in response to dna damage                                                                                                 | 1         |              |            |            | 0.034          |
| s1p1 pathway                                                                                                                                                | 1         |              |            |            | 0.043          |
| aurora b signaling                                                                                                                                          | 1         |              |            |            | 0.045          |
| neurotrophic factor-mediated trk receptor signaling                                                                                                         | 1         |              |            |            | 0.046          |
| insulin pathway                                                                                                                                             | 1         |              |            |            | 0.047          |
| role of erbb2 in signal transduction and oncology                                                                                                           | 0         |              |            |            |                |
| il-2 receptor beta chain in t cell activation                                                                                                               | 0         |              |            |            |                |

| <b>Names</b>                                                                           | <b>Set-Count</b> | <b>STZ-SCN-only</b> | <b>Concordant</b> | <b>Discordant</b> | <b>db/db-SCN-only</b> |
|----------------------------------------------------------------------------------------|------------------|---------------------|-------------------|-------------------|-----------------------|
| insulin signaling pathway                                                              | 0                |                     |                   |                   |                       |
| the igf-1 receptor and longevity                                                       | 0                |                     |                   |                   |                       |
| nerve growth factor pathway (ngf)                                                      | 0                |                     |                   |                   |                       |
| pdgf signaling pathway                                                                 | 0                |                     |                   |                   |                       |
| ras signaling pathway                                                                  | 0                |                     |                   |                   |                       |
| trka receptor signaling pathway                                                        | 0                |                     |                   |                   |                       |
| ikk-nf-kappab cascade ( cd4 t cell receptor signaling )                                | 0                |                     |                   |                   |                       |
| g alpha s gdp-gtp exchange signaling ( gpcr adenosine a2a receptor signaling pathway ) | 0                |                     |                   |                   |                       |
| il-6 signaling pathway(jak1 jak2 stat3) ( il-6 signaling(jak1 jak2 stat3) )            | 0                |                     |                   |                   |                       |
| akt(pkb) activation signaling ( insulin receptor signaling )                           | 0                |                     |                   |                   |                       |
| posttranslational regulation of adherens junction stability and disassembly            | 0                |                     |                   |                   |                       |
| osteopontin-mediated events                                                            | 0                |                     |                   |                   |                       |
| glypican 3 network                                                                     | 0                |                     |                   |                   |                       |
| gmcsf-mediated signaling events                                                        | 0                |                     |                   |                   |                       |
| il2 signaling events mediated by stat5                                                 | 0                |                     |                   |                   |                       |
| n-cadherin signaling events                                                            | 0                |                     |                   |                   |                       |
| signaling events regulated by ret tyrosine kinase                                      | 0                |                     |                   |                   |                       |
| s1p2 pathway                                                                           | 0                |                     |                   |                   |                       |
| s1p3 pathway                                                                           | 0                |                     |                   |                   |                       |
